# Supplementary material for: Acute Effect of a Single Dose of Tomato Sofrito on Plasmatic Inflammatory Biomarkers in Healthy Men
Source: MDPI journal article supplement (doi:10.3390/nu11040851), 2019-04-15
Supplement: s1 [file s1]

**Table S2.** Comparison of phytochemical composition of tomato and *sofrito* samples.

| Phytochemicals         | Tomato<br>(mg/240 g fresh weight) | Sofrito<br>(mg/240g fresh weight) |
|------------------------|-----------------------------------|-----------------------------------|
| Total polyphenols (mg) | 24.5                              | 60.4                              |
| Total carotenoids (mg) | 5.04                              | 59.2                              |

Values of polyphenols and carotenoids quantified in our group  
Data in mg/ dose administered  
Dose administered=

Sofrito is 240 g per 70 kg of body weight
