# Supplementary material for: Acute Effect of a Single Dose of Tomato Sofrito on Plasmatic Inflammatory Biomarkers in Healthy Men
Source: MDPI journal article supplement (doi:10.3390/nu11040851), 2019-04-15
Supplement: s1 [file s1]

**Table S1.** Nutritional value of *sofrito*.

| Nutrients                   |       |
|-----------------------------|-------|
| Energy <sup>1</sup>         | 278.4 |
| Total fats <sup>2</sup>     | 22.56 |
| Saturated fats <sup>2</sup> | 3.6   |
| Carbohydrate <sup>2</sup>   | 13.44 |
| Protein <sup>2</sup>        | 3.36  |
| Fibre <sup>2</sup>          | 3.84  |

Values of nutrients have been obtained from the product label

<sup>1</sup>Kcal/dose administered; <sup>2</sup>g/dose administered

Dose administered= 240 g per 70 kg of body weight
