# Supplementary material for: Acute Effect of a Single Dose of Tomato Sofrito on Plasmatic Inflammatory Biomarkers in Healthy Men
Source: MDPI journal article supplement (doi:10.3390/nu11040851), 2019-04-15
Supplement: s1 [file s1]

**Table S3.** Recommendations to follow a low antioxidant diet.

| Restricted                                                                                                                                                                  | Moderated                                                                           | Allowed                                                                                      |
|-----------------------------------------------------------------------------------------------------------------------------------------------------------------------------|-------------------------------------------------------------------------------------|----------------------------------------------------------------------------------------------|
| FOOD                                                                                                                                                                        |                                                                                     |                                                                                              |
| Whole cereals and corn                                                                                                                                                      | Vegetables: garlic, onion, turnip, eggplant (with peel), artichoke, iceberg lettuce | Refined cereals (white rice, pasta...)                                                       |
| Cured cheese                                                                                                                                                                | Soy and derivatives (tofu...)                                                       | Meat                                                                                         |
| Yolk                                                                                                                                                                        | Broad beans                                                                         | Fish                                                                                         |
| Green leafy vegetables (spinach, Swiss chard, watercress...)                                                                                                                | Fruits: pineapple, avocado, lemon, kiwi, banana                                     | Skimmed dairy products (milk, yogurt...)                                                     |
| Vegetables: carrot, tomato broccoli, cabbages, pepper, leek, pumpkin, asparagus, green beans, beet, sweet potato                                                            | Olive oil                                                                           | Egg white                                                                                    |
| Fruits: orange, tangerine, grapefruit, red fruits (strawberries, blueberries, blackberries, raspberries...), grape, pomegranate, plum, papaya, cantaloupe, persimmon, peach |                                                                                     | Vegetables: eggplant (without peel), celery, zucchini, cauliflower, radish, potato, cucumber |
| Olives                                                                                                                                                                      |                                                                                     | Mushrooms                                                                                    |
| Green peas                                                                                                                                                                  |                                                                                     | Fruits: apple (without peel), pear (without peel), pineapple in syrup, figs                  |
| Nuts (almonds, walnuts...)                                                                                                                                                  |                                                                                     | Legumes: white beans, chickpeas, lentils                                                     |
| Aromatic herbs (parsley, coriander, oregano...)                                                                                                                             |                                                                                     |                                                                                              |
| Spices (turmeric, paprika...)                                                                                                                                               |                                                                                     |                                                                                              |
| Mustard                                                                                                                                                                     |                                                                                     |                                                                                              |
| Algae                                                                                                                                                                       |                                                                                     |                                                                                              |
| Cocoa                                                                                                                                                                       |                                                                                     |                                                                                              |
| BEVERAGES                                                                                                                                                                   |                                                                                     |                                                                                              |
| Infusions and teas                                                                                                                                                          | Coffee (maxim 1 coffee/day)                                                         | Water                                                                                        |
| Beer                                                                                                                                                                        | Spirits                                                                             | Carbonated water                                                                             |
| Wine, cava or cider                                                                                                                                                         |                                                                                     | Soda                                                                                         |
| Cocoa beverage                                                                                                                                                              |                                                                                     | Chicken or fish broth (without vegetables)                                                   |
| Fruit juices                                                                                                                                                                |                                                                                     |                                                                                              |
| Vegetables beverage (soymilk, almonds milk...)                                                                                                                              |                                                                                     |                                                                                              |
